# Supplementary material
Source: PubMed Central journal article supplement (PMC8742658)
Supplement: NIHMS1767059-supplement-SI.pdf [file NIHMS1767059-supplement-SI.pdf]

# Supporting Information

6 Pages

10 Figures

## PCL-based shape memory polymer semi-IPNs: The role of miscibility in tuning degradation rate

*Michaela R. Pfau,<sup>1</sup> Kelly G. McKinzey,<sup>1</sup> Abigail A. Roth,<sup>1</sup> Melissa A. Grunlan<sup>1,2,3\*</sup>*

<sup>1</sup>Department of Biomedical Engineering, Texas A&M University, College Station, Texas 77843, United States.

<sup>2</sup>Department of Materials Science and Engineering, Texas A&M University, College Station, Texas 77843, United States.

<sup>3</sup>Department of Chemistry, Texas A&M University, College Station, Texas 77843, United States.

(a)

| Polymer    | M <sub>n</sub> (kDa)<br>(NMR) | Ratio L:G<br>(NMR) | T <sub>g</sub> (°C)<br>(DSC) | T <sub>m</sub> (°C)<br>(DSC) | % Cryst<br>(DSC) |
|------------|-------------------------------|--------------------|------------------------------|------------------------------|------------------|
| PCL-diol   | Sigma                         | -                  | -65.2 ± 0.98                 | 52.6 ± 0.16                  | 46.5 ± 0.21      |
| 7.5k PLLA  | 8.3                           | -                  | 44.9 ± 0.93                  | 153.1 ± 0.35                 | 49.3 ± 1.9       |
| 15k PLLA   | 15.1                          | -                  | 45.1 ± 0.72                  | 155.4 ± 0.35                 | 52.7 ± 0.14      |
| 30k PLLA   | 27.5                          | -                  | 46.3 ± 2.78                  | 158.8 ± 0.85                 | 56.2 ± 1.4       |
| 120k PLLA  | Sigma                         | -                  | 50.4 ± 0.47                  | 170.3 ± 0.22                 | 20.0 ± 1.2       |
| PDLLA      | 11.3                          | -                  | 28.4 ± 0.13                  | -                            | -                |
| 85:15 PLGA | 14.2                          | 84:16              | 41.2 ± 1.49                  | 137.4 ± 6.2                  | 3.17 ± 0.74      |
| 70:30 PLGA | 12.7                          | 67:33              | 37.3 ± 2.22                  | -                            | -                |
| 50:50 PLGA | 11.7                          | 49:51              | 21.1 ± 0.37                  | -                            | -                |

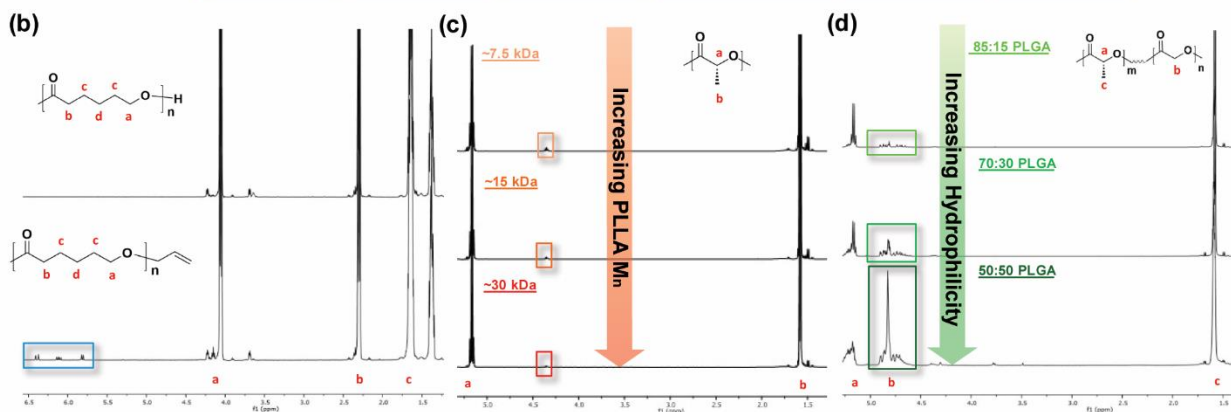

**Figure S1.** NMR and DSC results for each polymer are summarized in the table (a), stacked NMR showing successful acrylation of PCL [acrylate peaks boxed in blue] (b), stacked NMR showing PLLA with increasing M<sub>n</sub> [as reference peak, boxed in orange, decreases] (c) and stacked NMR showing PLGAs with increasing glycolide content [boxed in green] (d).

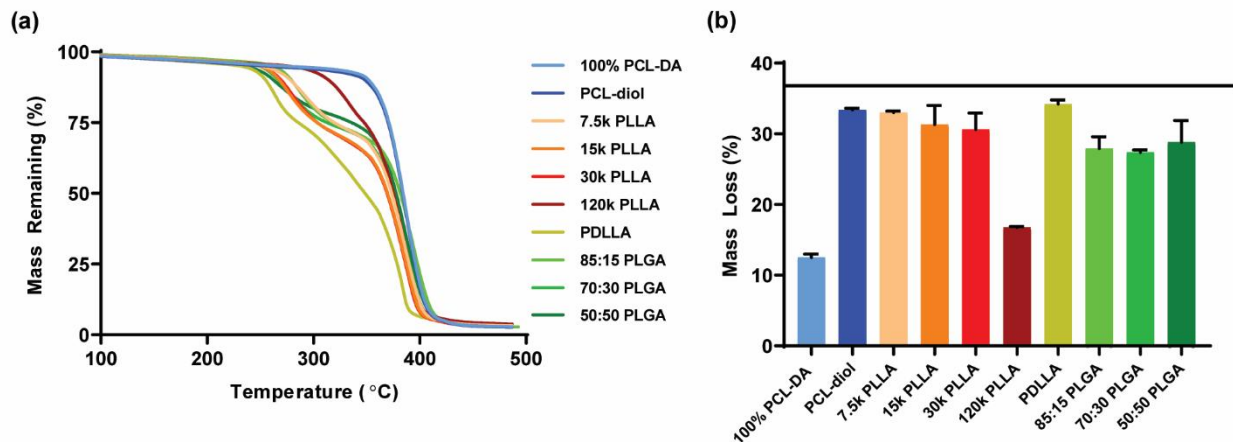

**Figure S2.** TGA results verifying ~25% thermoplastic in PCL-DA/PLA semi-IPNs (a) and sol content values demonstrating adequate cross-linking with an upper limit of ~37% mass loss [~12% 100% PCL-DA control + ~25% thermoplastic] for semi-IPN films (b).

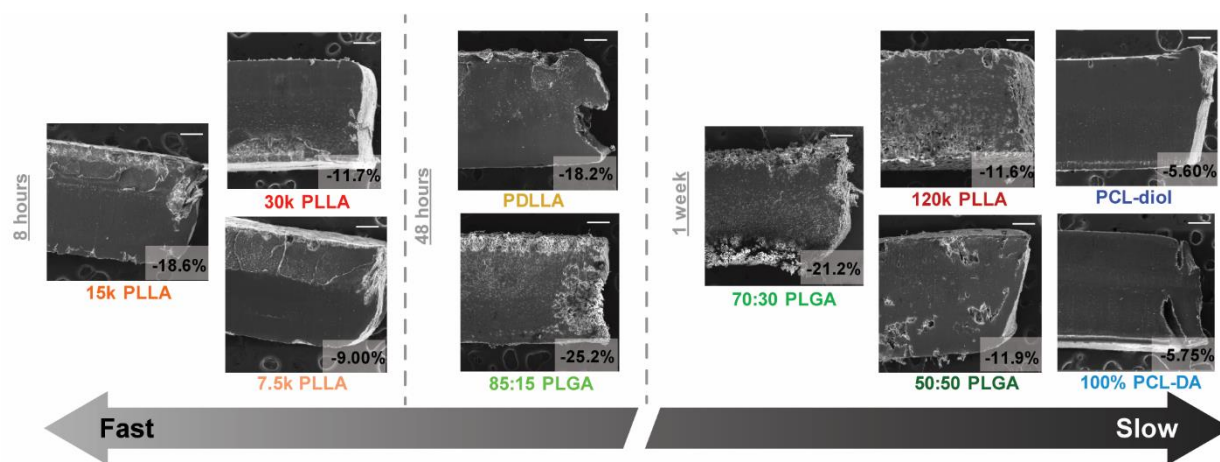

**Figures S3.** SEM of degraded film cross-sections at noted timepoints and ranking of PCL-DA/PLA semi-IPNs based on degradation rate. Average mass loss values are noted on the SEM images. Scale bars = 250  $\mu$ m.

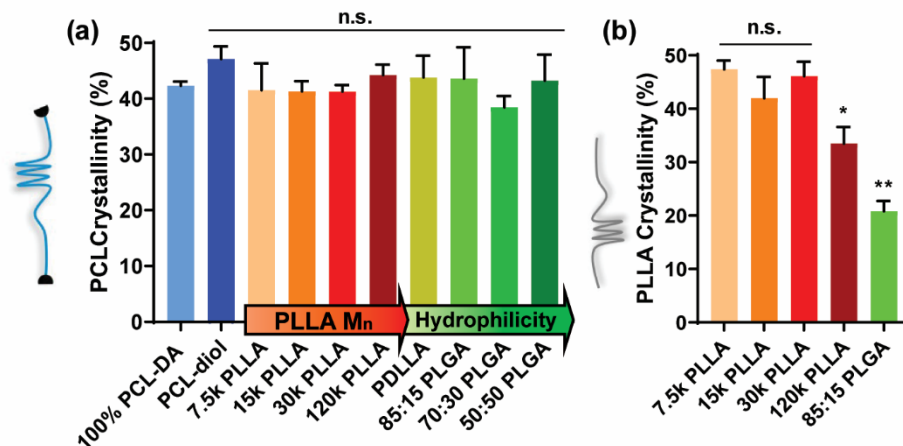

**Figure S4.** PCL % crystallinity of semi-IPNs was maintained at ~40% (corrected for relative mass percent of PCL-DA in the semi-IPN),  $*p < 0.05$  versus the 100% PCL-DA control (a). PLLA % crystallinity of the 120 k PLLA semi-IPN (~33%) was significantly reduced versus that of 7.5 k, 15 k and 30 k PLLA semi-IPNs (~45%). PLLA % crystallinity of the 85:15 PLGA semi-IPN increased to ~20% (versus ~3% for PLGA thermoplastic).  $*p < 0.05$  and  $**p < 0.01$  versus the 7.5 k PLLA.

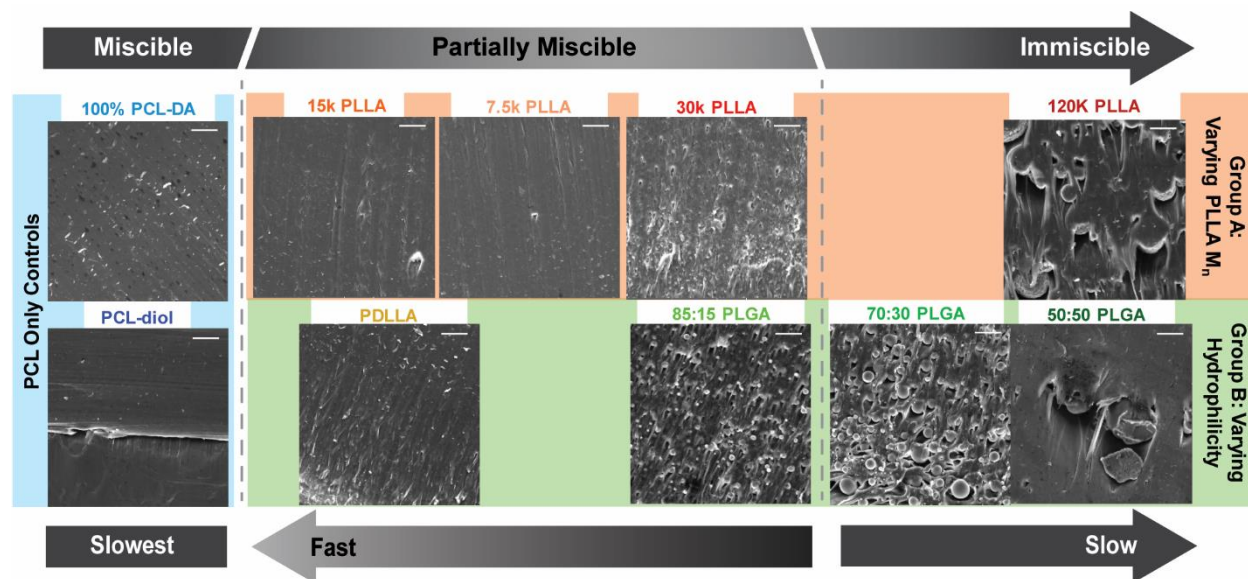

**Figure S5.** SEM images of semi-IPNs and controls film cross-sections prior to degradation. Categorization of miscibility (“miscible”, “partially miscible” or “immiscible”) based on extent of phase separation and corresponding relative rate of degradation (slow or fast). Scale bars = 50  $\mu\text{m}$ .

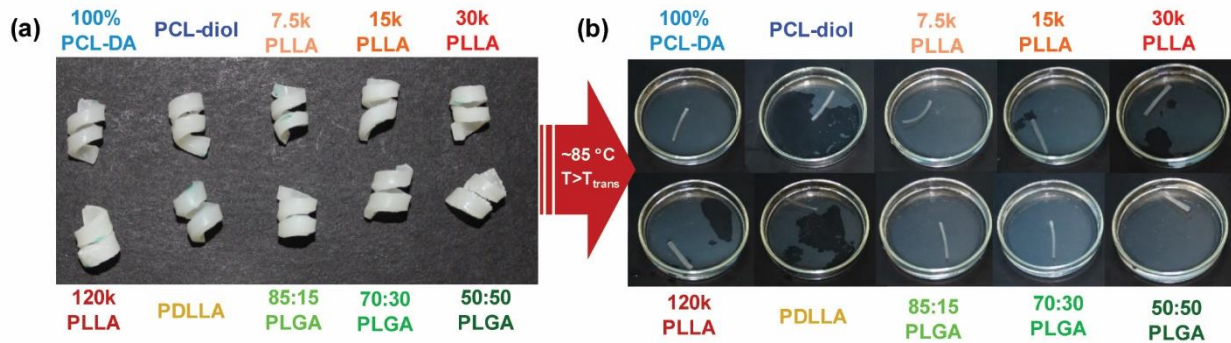

**Figure S6.** Qualitative shape memory testing was performed and all compositions were able to effectively hold a temporary coil shape (a), and upon heating, all samples returned to their permanent rectangular shape in ~10 sec (b).

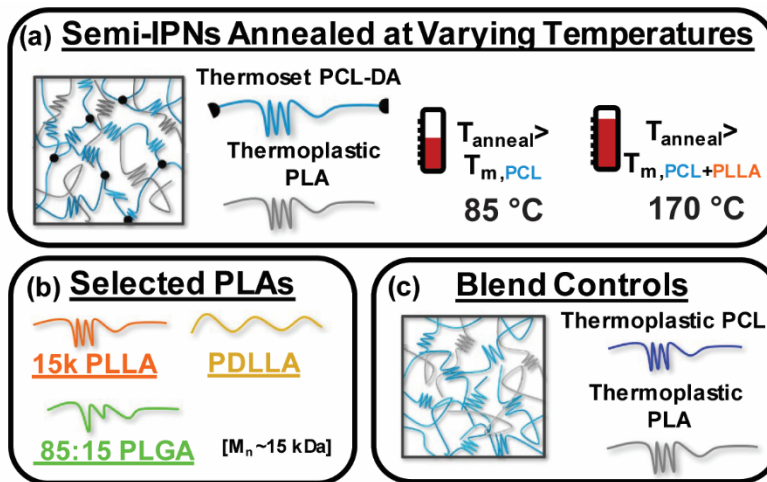

**Figure S7.** Schematic summarizing the study to assess the impact of increased annealing temperature for selected semi-IPNs (a), PLA thermoplastics used to form the semi-IPNs (b) and blend controls (c).

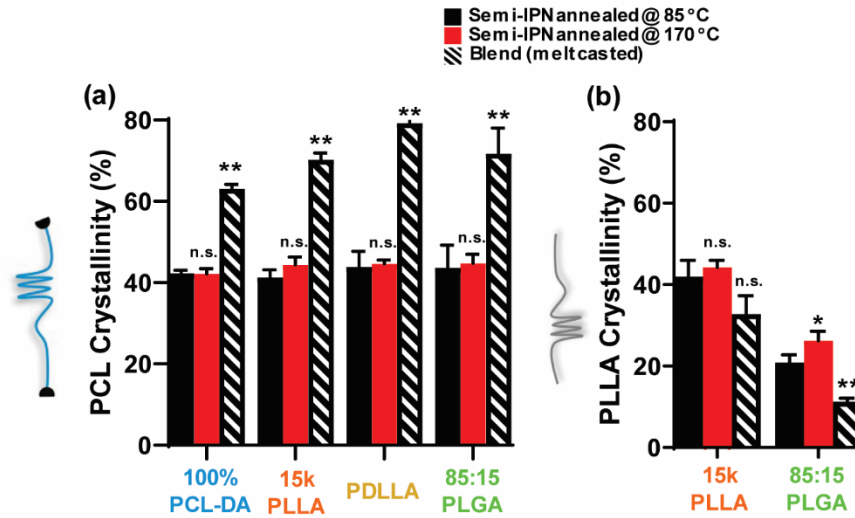

**Figure S8.** PCL % crystallinity (a) and PLLA % crystallinity (b) in PCL-DA/PLA semi-IPNs and controls annealed at 85 °C and 170 °C and analogous blend controls. Values were corrected for mass percent and PCL % crystallinity was maintained in semi-IPNs annealed at both temperatures but was significantly higher in all blends. \* $p < 0.05$  and \*\* $p < 0.01$  versus the corresponding control or semi-IPN annealed at 85 °C (a) and \* $p < 0.05$  and \*\* $p < 0.01$  versus the corresponding semi-IPN annealed at 85 °C (b).

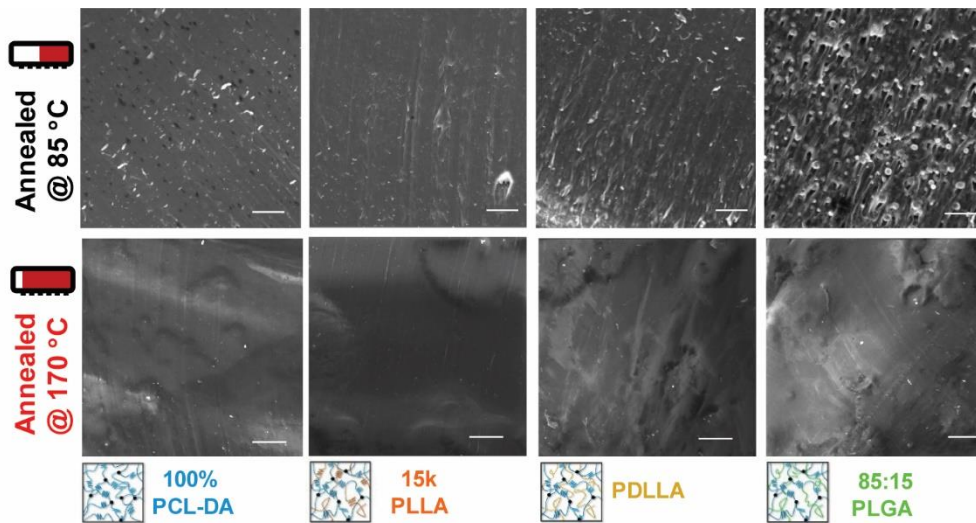

**Figure S9.** SEM of semi-IPN and control film cross-sections (annealed at 85 °C or 170 °C) prior to degradation. Annealing at the higher temperature reduced phase separation. Scale bars = 50 μm.



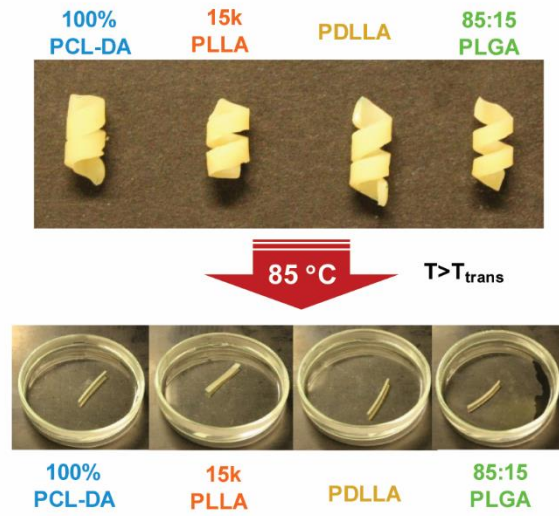

**Figure S10.** Shape memory properties were visualized qualitatively, and all compositions annealed at 170 °C were shown to maintain shape fixity (a) and shape recovery (b).
